# Supplementary material for: A GMMA-CPS-Based Vaccine for Non-Typhoidal Salmonella
Source: MDPI journal article supplement (doi:10.3390/vaccines9020165), 2021-02-17
Supplement: s1 [file s1]

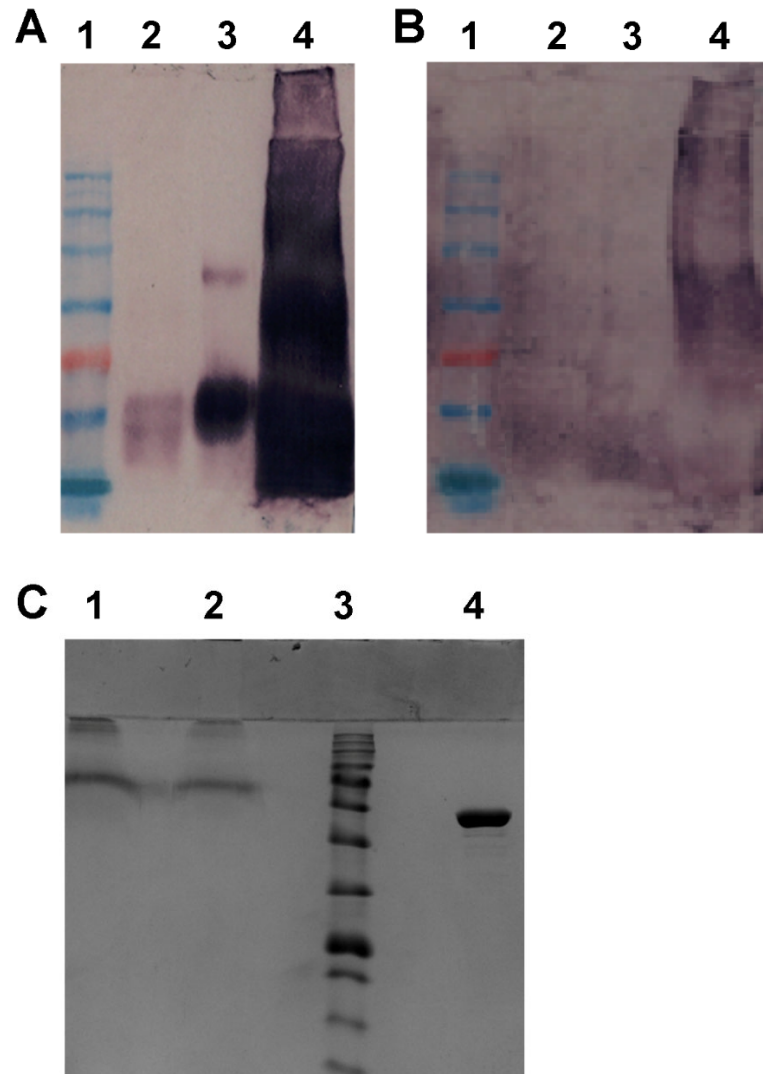

**Supplementary Figure 1.** Conjugation of *S. Typhimurium* CPS to carrier proteins.

**A,B.** Western blots of truncated glycoprotein (tGD) conjugated to CPS, using tGD-specific immune serum (**A**) or CPS-specific immune serum (**B**) as the primary antibody. The same samples were loaded: tGD conjugated to itself (Lane 2), tGD alone (Lane 3) or tGD conjugated to CPS (Lane 4). Pre-stained protein ladder was loaded in Lane 1; the molecular weight of tGD was 66 kDa.

**C.** SDS-PAGE analysis showing inactivated diphtheria toxin (CRM197) conjugated to CPS (Lanes 1 and 2), pre-stained protein ladder (Lane 3), and CRM197 alone (Lane 4). The molecular weight of CRM197 was 58 kDa.
